# Supplementary material
Source: publisher site journal article supplement (https://www.degruyterbrill.com/publication/journal_key/OPENEC/downloadAsset/OPENEC_CFP%20Universal%20Basic%20Income.pdf)
Supplement: Supplementary file 1 [file OPENEC_CFP%20Universal%20Basic%20Income.pdf]

# UNIVERSAL BASIC INCOME

## GUEST EDITOR

---

Dr. Soomi Lee, College of Business and Public Management, University of La Verne, US

## DESCRIPTION

---

**Open Economics** is a peer-reviewed Open Access journal, devoted to the publication of original research in all fields of Economics.

This **topical issue** aims to gather analyses and reviews that enhance the understanding of the basic income. Original theoretical and empirical research papers that make clear contributions to the field are especially welcome.

## SCOPE

---

The scope of this Topical Issue includes, but is not limited to, the following areas of research:

- ▶ Basic income in different political systems
- ▶ Social security and welfare state in the era of digital economy
- ▶ Politics of basic income
- ▶ Public opinion on basic income
- ▶ Basic income in the changing labor market with artificial intelligence and automation
- ▶ Basic income and the welfare state reform in developed countries
- ▶ Basic income in developing countries

## HOW TO SUBMIT

---

Authors are kindly invited to submit their contribution via online submission system Editorial Manager available at [www.editorialmanager.com/economics](http://www.editorialmanager.com/economics)

Please remember about choosing **correct article category – TI: Basic Income** to ensure that it will be processed with the highest priority.

Before completing their manuscript, authors should carefully read over the journal's [Instruction for Authors](#). Additional information can be found in our [Editorial Policy](#).

In case of any questions please contact the Managing Editor of Open Economics, **Konrad Sarzyński** [konrad.sarzyński@degruyter.com](mailto:konrad.sarzyński@degruyter.com).

## TIMELINE

---

Deadline for article submission: **June 30, 2020** via journal submission system [www.editorialmanager.com/economics](http://www.editorialmanager.com/economics).

Planned publication: December 2020 (articles will be published upon being accepted on an ongoing basis).
